# Supplementary material
Source: PubMed Central journal article supplement (PMC9487599)
Supplement: aac.00002-22-s0001.pdf [file aac.00002-22-s0001.pdf]

## Kaplan-Meier survival curve

without PCR correction

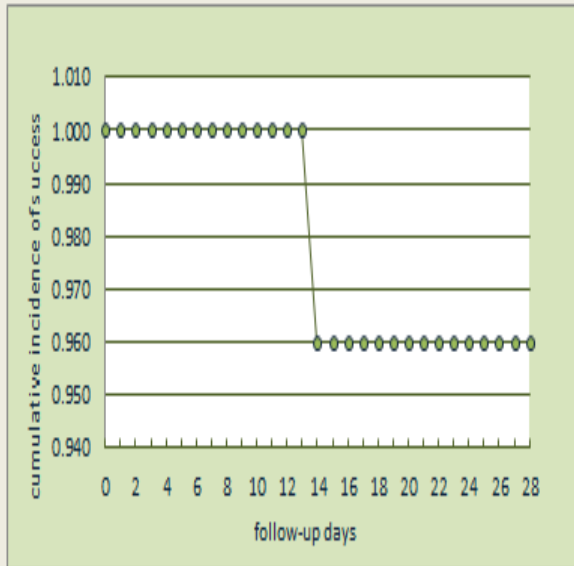

| Number of patients                        |    |
|-------------------------------------------|----|
| ACPR day 28                               | 48 |
| Censored (lost to follow-up, withdrawals) | 10 |
| Treatment failures                        | 2  |

|                                         |       | 95% CI       |
|-----------------------------------------|-------|--------------|
| Cumulative incidence of success, day 28 | 0.960 | (0.849-0.99) |
| Cumulative incidence of failure, day 28 | 0.040 | (0.01-0.151) |

with PCR correction

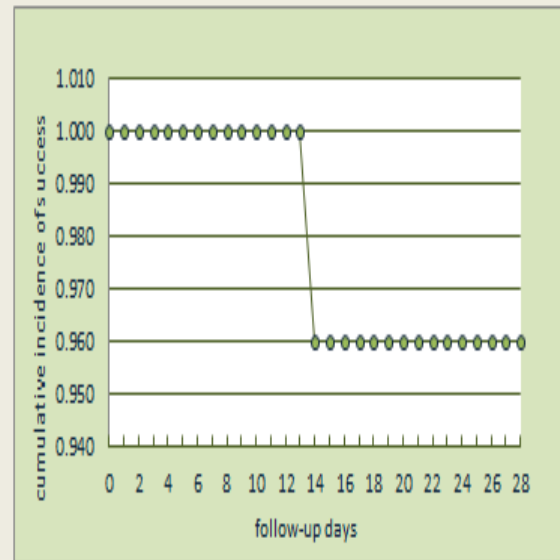

| Number of patients                                      |    |
|---------------------------------------------------------|----|
| ACPR day 28                                             | 48 |
| Censored (lost to follow-up, withdrawals, reinfections) | 10 |
| Treatment failures (PCR confirmed recrudescence)        | 2  |

|                                         |       | 95% CI       |
|-----------------------------------------|-------|--------------|
| Cumulative incidence of success, day 28 | 0.960 | (0.849-0.99) |
| Cumulative incidence of failure, day 28 | 0.040 | (0.01-0.151) |

Figure S1: Kaplan-meier analysis of adequate clinical and parasitological response rate (ACPR) of Artemether-Lumefantrine, western Ethiopia, September to December 2020.
